# Supplementary material for: Vascular smooth muscle-MAPK14 is required for neointimal hyperplasia by suppressing VSMC differentiation and inducing proliferation and inflammation
Source: PubMed Central journal article supplement — Redox Biol. 2019 Feb 6;22:101137. doi: 10.1016/j.redox.2019.101137 (PMC6377391; doi:10.1016/j.redox.2019.101137), 2019-02-06

# supplemental Fig. I

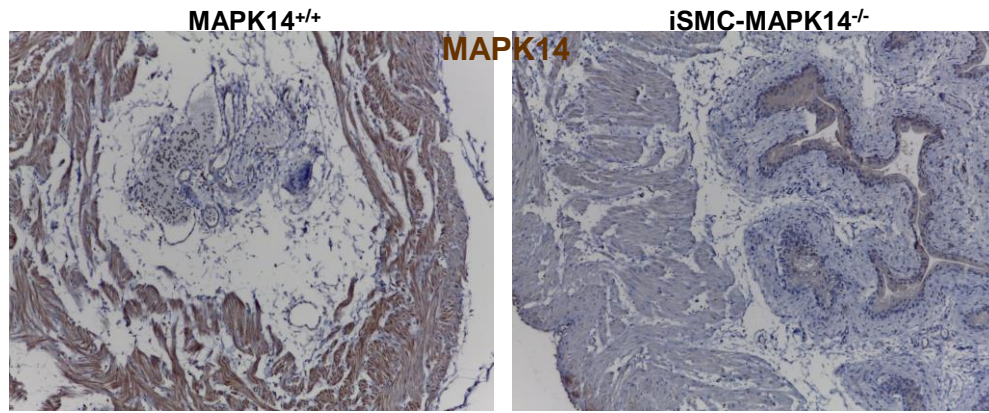

bladder

# supplemental Fig. II

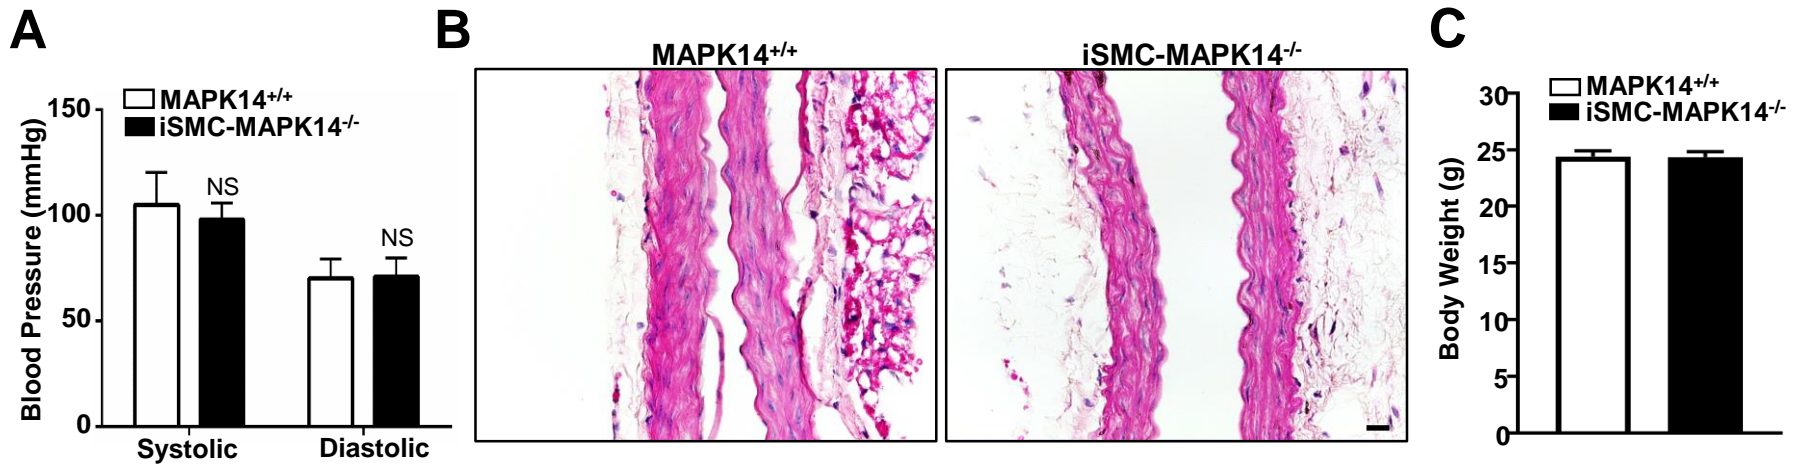

supplemental Fig. III

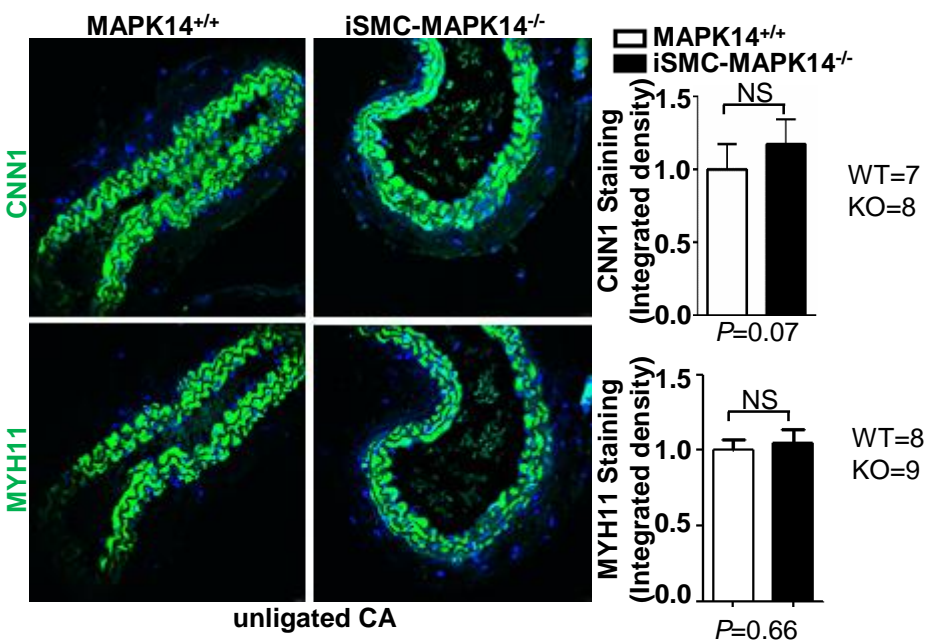

supplemental Fig. IV

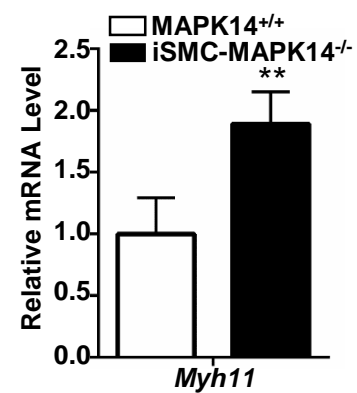

supplemental Fig. V

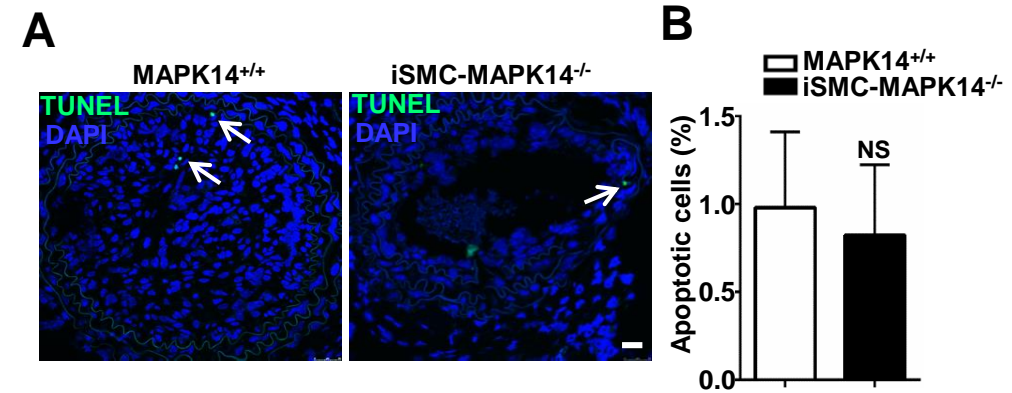

supplemental Fig. VI

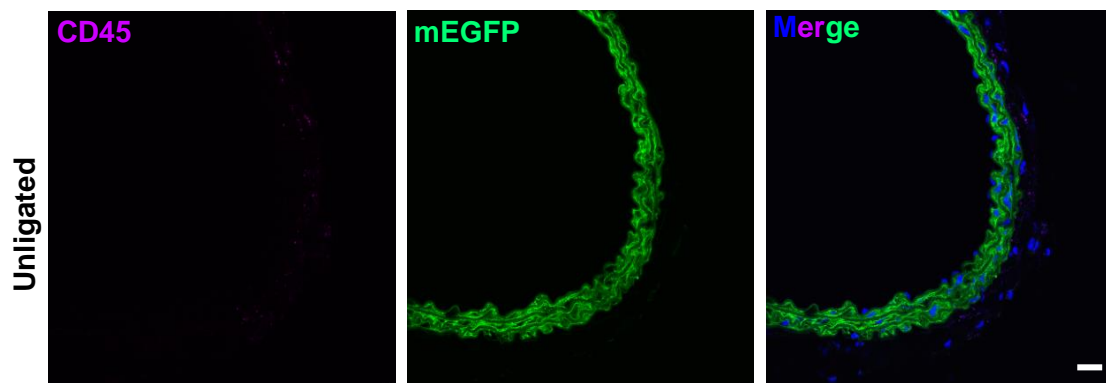

supplemental Fig. VII

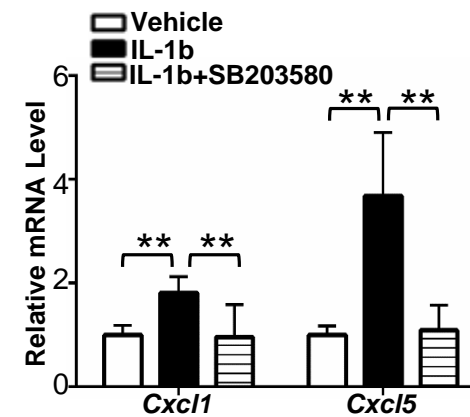

supplemental Fig. VIII

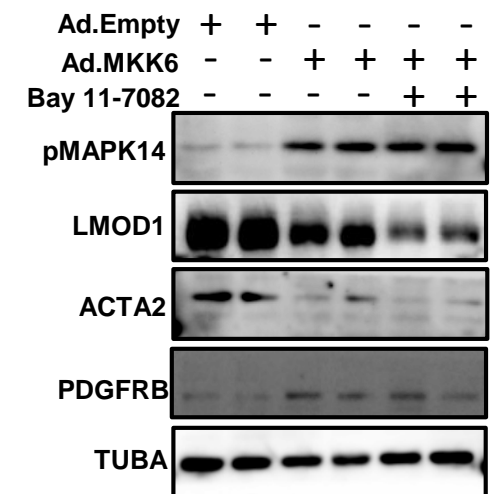

supplemental Fig. VIII

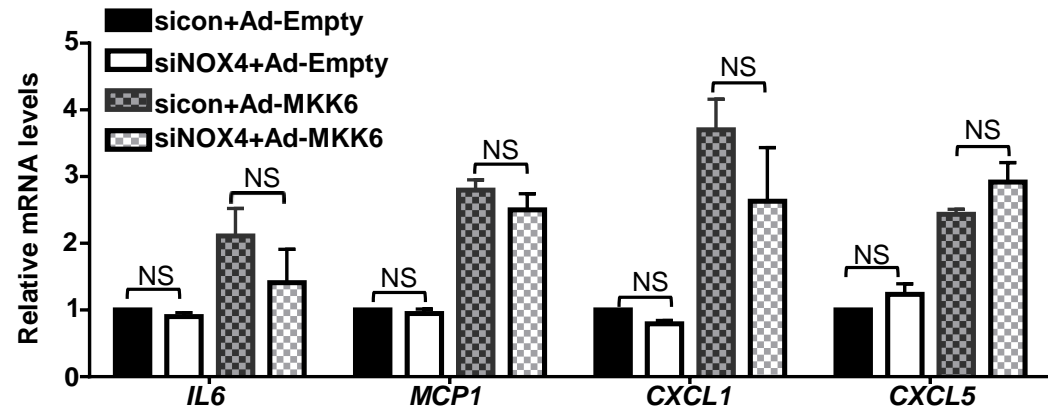

Supplement: mmc1.pdf [file mmc1.pdf]
